# Supplementary material
Source: PubMed Central journal article supplement (PMC2976777)

**Supplemental Information Table of Contents**

| <b>Page</b> | <b>Content</b>                                                                                                                                                                                                                                                                                                                                                                                                                                                                                                                                                                                                                                                                                                                                                                         |
|-------------|----------------------------------------------------------------------------------------------------------------------------------------------------------------------------------------------------------------------------------------------------------------------------------------------------------------------------------------------------------------------------------------------------------------------------------------------------------------------------------------------------------------------------------------------------------------------------------------------------------------------------------------------------------------------------------------------------------------------------------------------------------------------------------------|
| <b>S2</b>   | (A) Analytical RP-HPLC chromatogram of purified MAX8, (B) ESI (+) mass spectrum of purified MAX8                                                                                                                                                                                                                                                                                                                                                                                                                                                                                                                                                                                                                                                                                       |
| <b>S3</b>   | Dynamic oscillatory rheology of 1.0 wt% MAX8 hydrogel at pH 7.4, 50 mM BTP, 150 mM NaCl, and 37°C alone and with encapsulated proteins: (A) Dynamic frequency sweep at 0.2% strain of (i) MAX8 alone, (ii) MAX8 encapsulating positively charged proteins: lysozyme and lactoferrin, (iii) MAX8 encapsulating neutral proteins: myoglobin and human IgG, and (iv) MAX8 encapsulating negatively charged proteins: $\alpha$ -lactalbumin and bovine serum albumin. (B) Dynamic strain sweep at 6 rad/sec of (i) MAX8 alone, (ii) MAX8 encapsulating positively charged proteins: lysozyme and lactoferrin, (iii) MAX8 encapsulating neutral proteins: myoglobin and human IgG, and (iv) MAX8 encapsulating negatively charged proteins: $\alpha$ -lactalbumin and bovine serum albumin. |
| <b>S4</b>   | Dynamic oscillatory rheology of shear-thinned 1.0 wt% MAX8 hydrogel at pH 7.4, 50 mM BTP, 150 mM NaCl, and 37°C alone and with encapsulated proteins: (A) Dynamic frequency sweep at 0.2% strain of (i) MAX8 alone, (ii) MAX8 encapsulating small proteins: lysozyme, myoglobin, and $\alpha$ -lactalbumin (iii) MAX8 encapsulating human IgG. (B) Dynamic strain sweep at 6 rad/sec of (i) MAX8 alone, (ii) MAX8 encapsulating small proteins: lysozyme, myoglobin, and $\alpha$ -lactalbumin (iii) MAX8 encapsulating human IgG.                                                                                                                                                                                                                                                     |

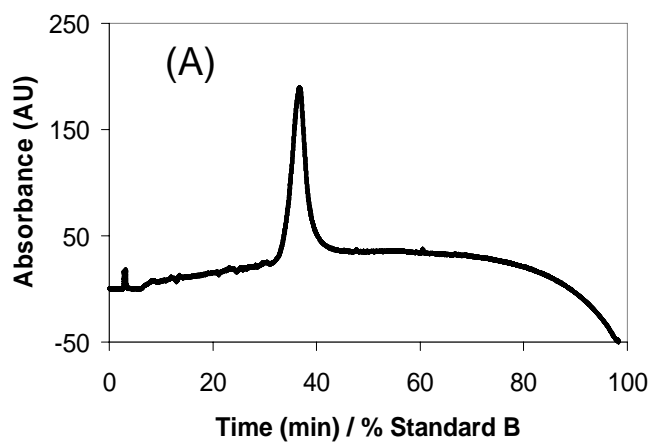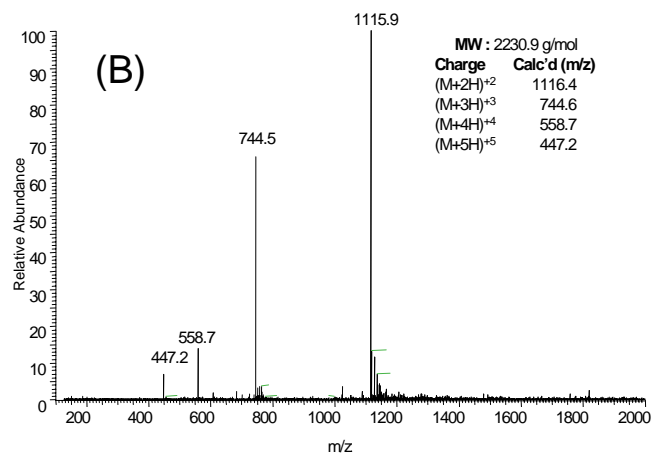

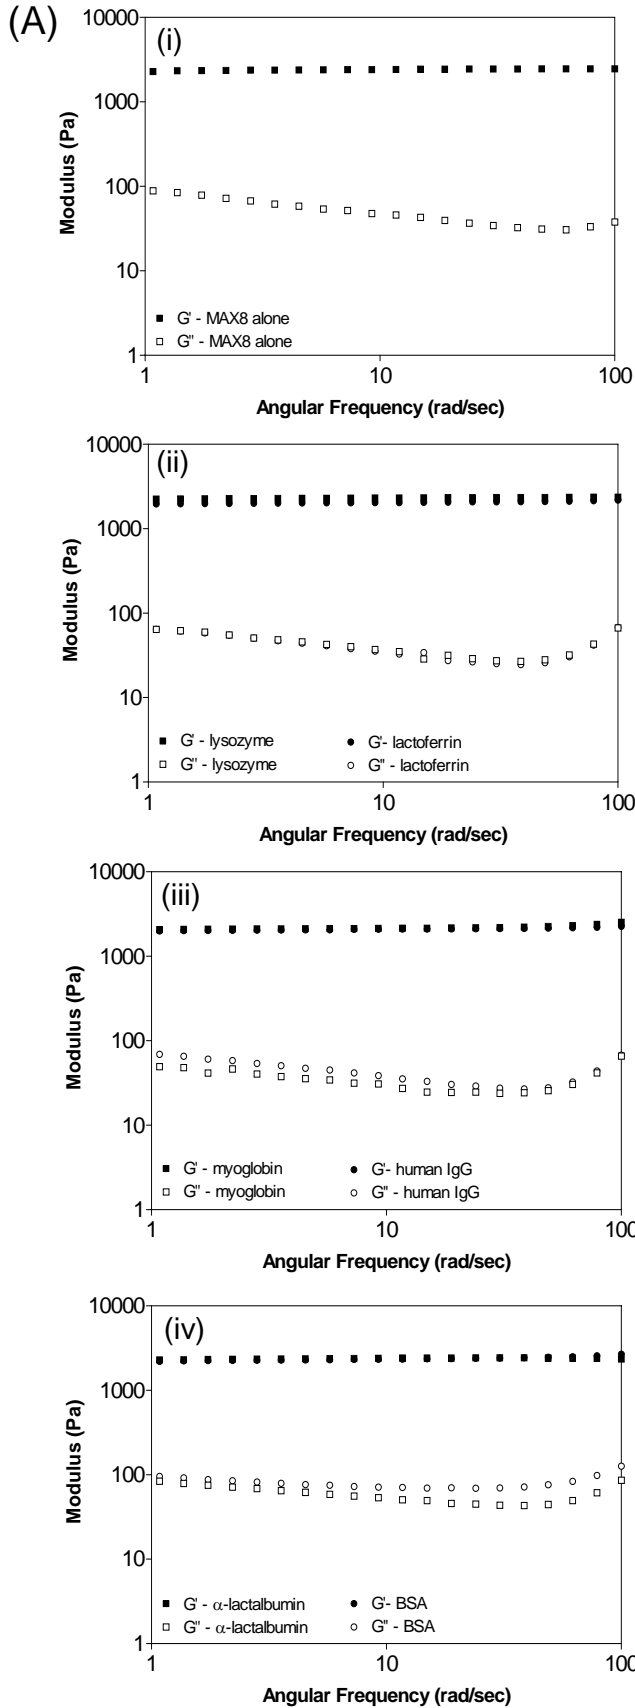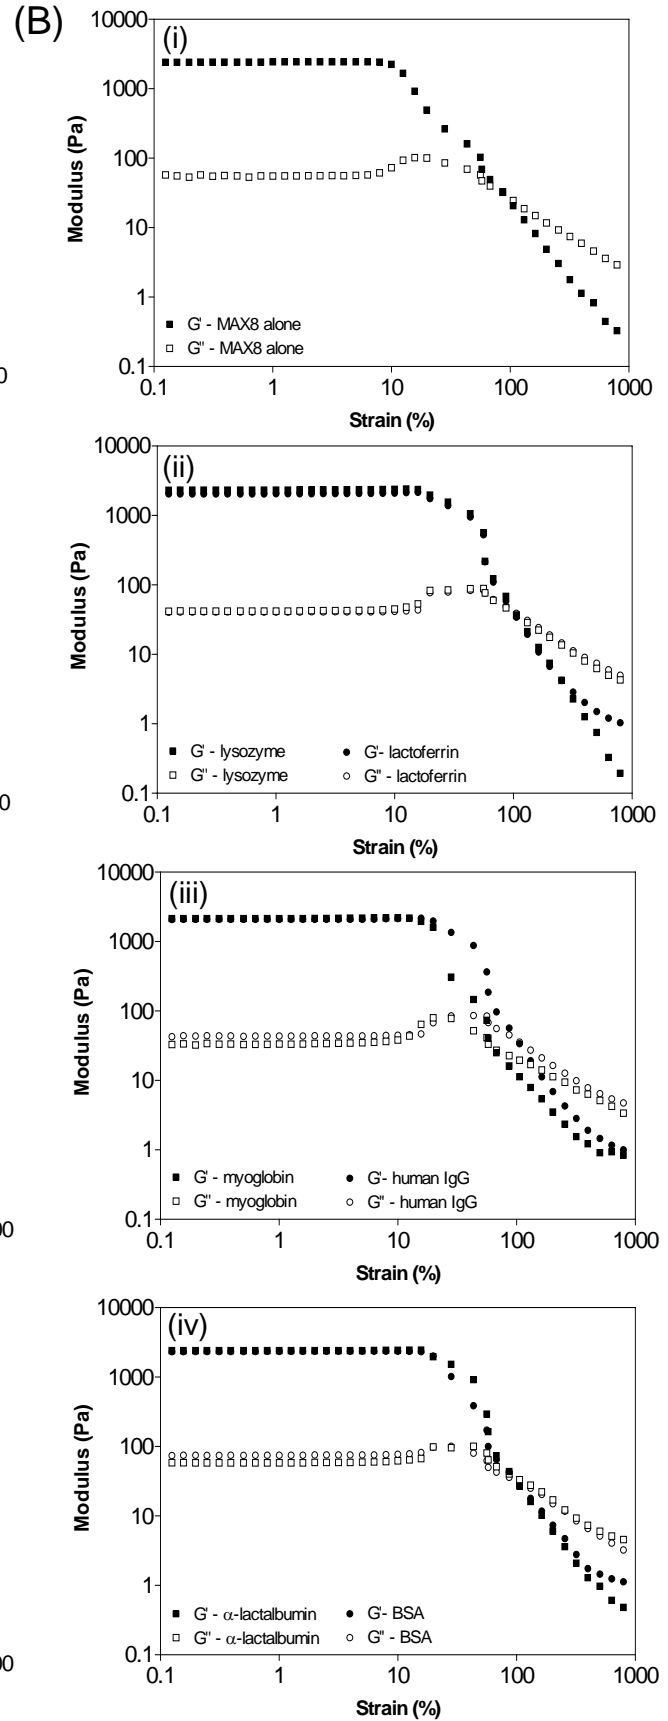

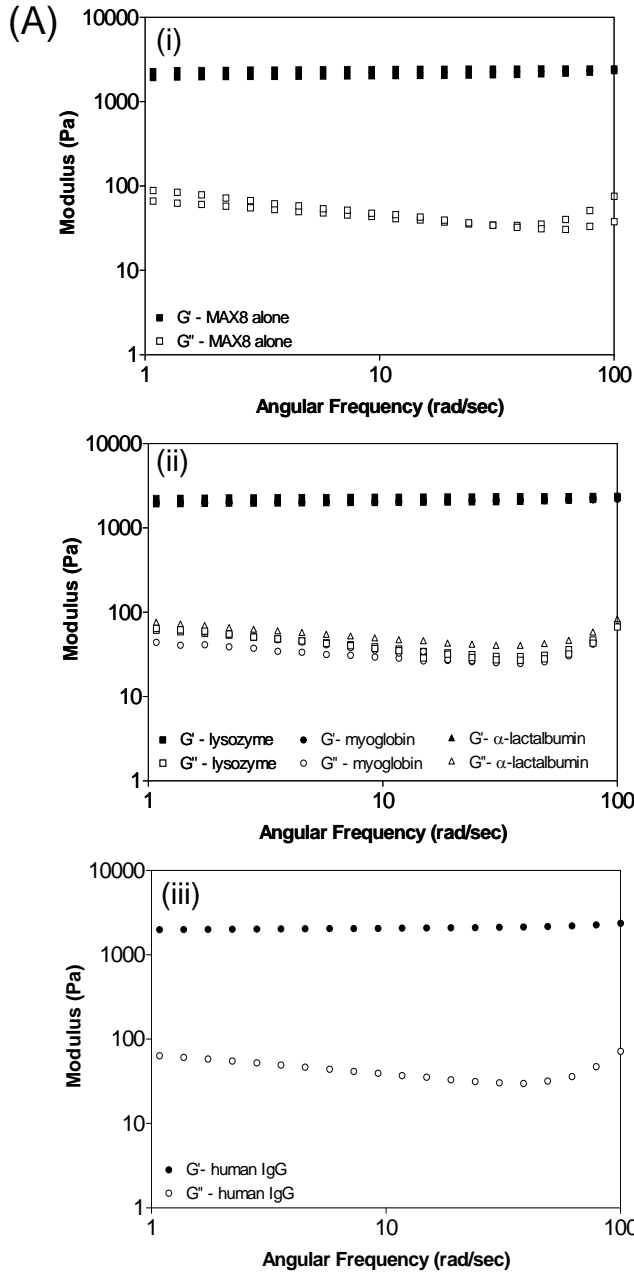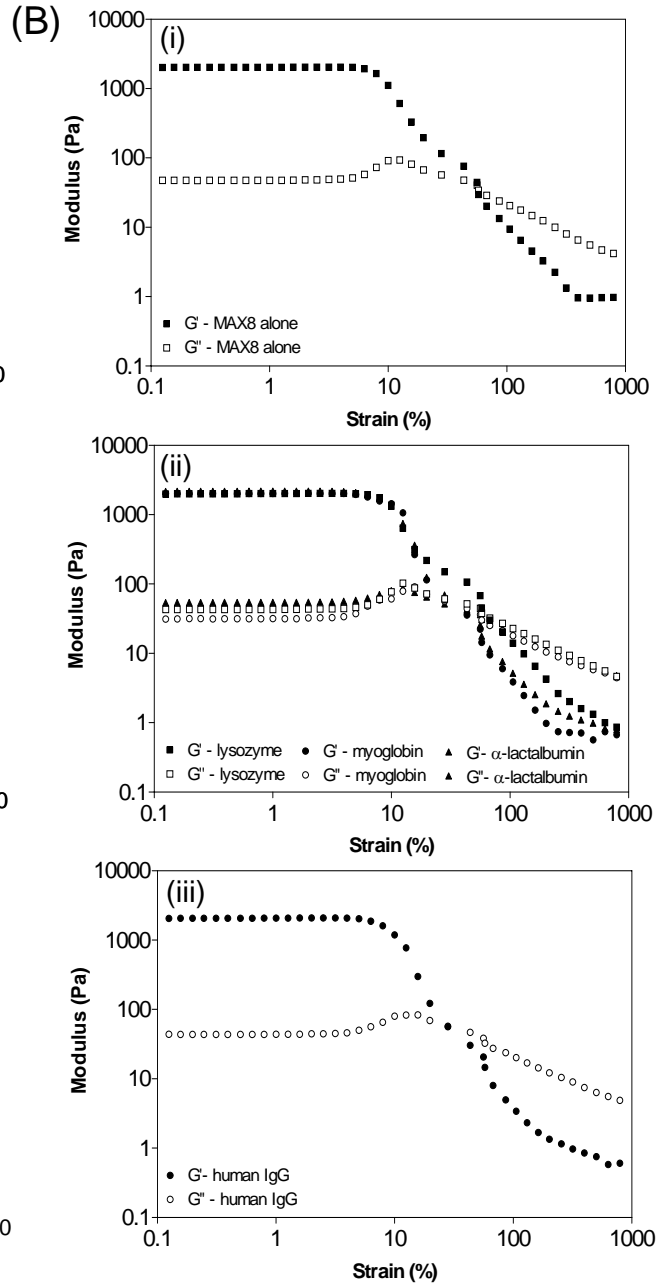

Supplement: NIHMS234264-supplement-01.pdf [file NIHMS234264-supplement-01.pdf]
